# Supplementary material
Source: PubMed Central journal article supplement (PMC5766378)

**A Homologous Competition Binding**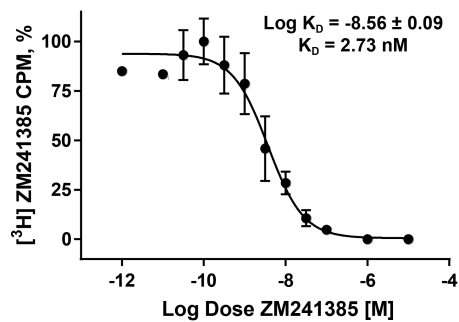**Competition Binding**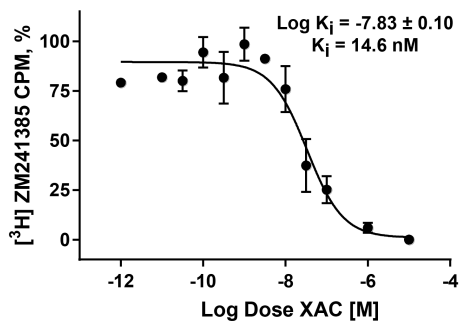**Competition Binding**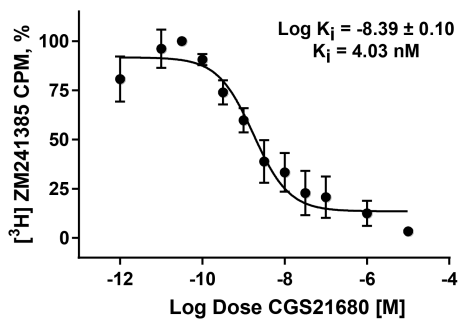**Competition Binding**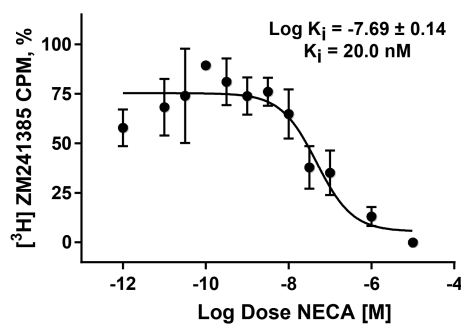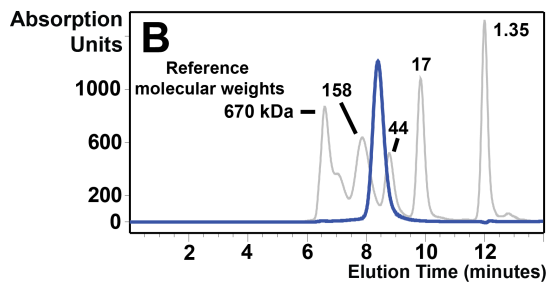**E**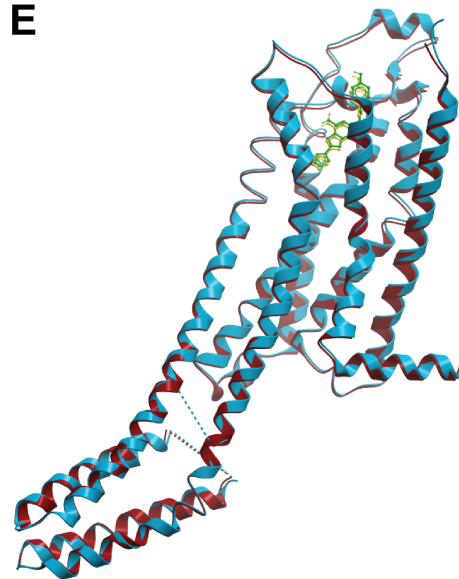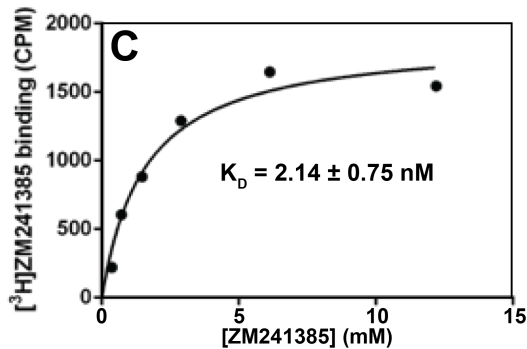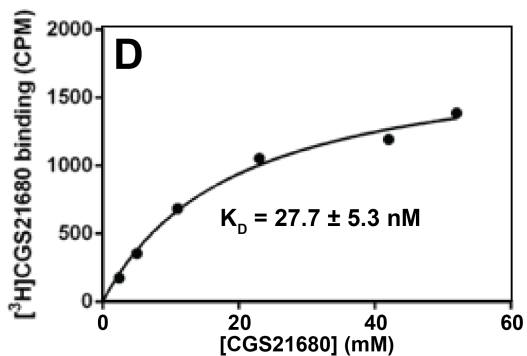**F**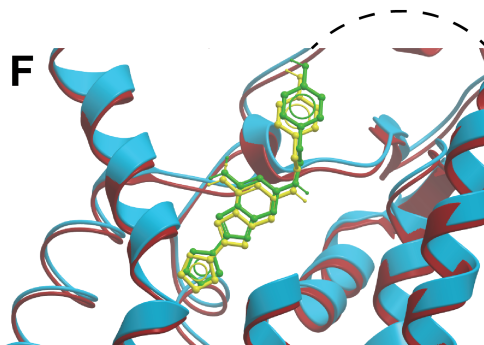

Supplement: NIHMS930888-supplement-3.pdf [file NIHMS930888-supplement-3.pdf]
