# Supplementary material
Source: PubMed Central journal article supplement (PMC5766378)
Supplement: NIHMS930888-supplement-8.pdf [file NIHMS930888-supplement-8.pdf]

|             | PDB ID         | Ligand   | N $\epsilon$ 1/ H $\epsilon$ 1 Chemical Shifts (ppm) |        |        |        |        |        |
|-------------|----------------|----------|------------------------------------------------------|--------|--------|--------|--------|--------|
|             |                |          | W29                                                  | W32    | W129   | W143   | W246   | W268   |
| Antagonists | 3EML           | ZM241385 | 0.139                                                | -0.005 | 0.138  | 0.055  | -0.713 | -0.022 |
|             |                |          | 0.188                                                | -0.016 | 0.128  | 0.070  | -0.480 | -0.021 |
|             | 3REY           | XAC      | 0.275                                                | 0.019  | 0.118  | 0.130  | -1.049 | -0.030 |
| Antagonists | 3RFM           | Caffeine | 0.327                                                | 0.010  | 0.112  | 0.156  | -0.819 | -0.024 |
|             |                |          | 0.233                                                | 0.001  | 0.105  | 0.093  | -1.020 | -0.017 |
|             | 0.233          | 0.008    | 0.107                                                | 0.130  | -0.780 | -0.017 |        |        |
| Agonists    | 2YDV           | NECA     | 0.340                                                | 0.041  | 0.062  | 0.149  | -0.506 | -0.040 |
|             |                |          | 0.337                                                | 0.030  | 0.061  | 0.139  | -0.248 | -0.041 |
|             | 3QAK           | UK432097 | -0.005                                               | -0.155 | 0.100  | 0.110  | -0.478 | -0.005 |
|             |                |          | -0.003                                               | 0.026  | 0.084  | 0.114  | -0.222 | -0.003 |
|             | 4UHR           | CGS21680 | -0.014                                               | -0.070 | 0.060  | 0.060  | -0.352 | -0.051 |
| -0.045      |                |          | -0.044                                               | 0.047  | 0.110  | -0.186 | -0.048 |        |
| 5G53        | NECA + mini Gs | -0.053   | 0.034                                                | 0.103  | 0.121  | -0.178 | -0.011 |        |
|             |                |          | -0.115                                               | -0.124 | 0.097  | 0.105  | -0.024 | -0.009 |

**Table S1 (Related to Figures 2 to 4). Ring Current Shifts for the Tryptophan Indole  $^{15}\text{N}$ - $^1\text{H}$  Signals Calculated from the Crystal Structures.**

Ring current shifts were calculated with the program MOLMOL (Koradi et al., 1996) for the tryptophan N $\epsilon$ 1 and H $\epsilon$ 1 atoms in six crystal structures of A<sub>2A</sub>AR complexes with ligands of different efficacies (Figures 3E and 4, A–C).

| Chemical Shifts of Numbered Signals for A <sub>2A</sub> AR Variants (ppm) <sup>1</sup> |                    |                |                |                |                |                |                |
|----------------------------------------------------------------------------------------|--------------------|----------------|----------------|----------------|----------------|----------------|----------------|
| Peak Number                                                                            | A <sub>2A</sub> AR | W29Y           | W32Y           | W129Y          | W143Y          | W246F          | W268Y          |
| 1                                                                                      | 6.75<br>100.97     | 6.75<br>100.99 | 6.74<br>100.85 | 6.70<br>100.87 | 6.91<br>101.18 | 6.74<br>100.97 | 6.75<br>100.94 |
| 2                                                                                      | 7.59<br>104.63     | 7.59<br>104.68 | 7.64<br>104.70 | 7.64<br>104.72 | 7.59<br>104.63 | 7.60<br>104.68 | 7.60<br>104.68 |
| 3                                                                                      | 7.68<br>105.35     | 7.68<br>105.31 | 7.69<br>105.35 | 7.69<br>105.50 | 7.69<br>105.33 | 7.68<br>105.33 | 7.69<br>105.33 |
| 4                                                                                      | 7.13<br>106.15     | 7.13<br>106.07 | 7.14<br>106.19 |                | 7.09<br>106.07 | 7.14<br>106.17 | 7.14<br>106.12 |
| 5                                                                                      | 8.67<br>108.95     | 8.67<br>109.04 | 8.67<br>108.94 | 8.65<br>108.95 | 8.63<br>109.64 | 8.66<br>108.95 | 8.67<br>108.97 |
| 6                                                                                      | 9.02<br>110.39     | 9.03<br>110.42 | 9.02<br>110.37 | 8.99<br>110.76 | 9.03<br>110.42 | 9.03<br>110.39 | 9.03<br>110.44 |
| 7                                                                                      | 7.80<br>110.80     | 7.80<br>110.78 | 7.81<br>110.80 | 7.80<br>110.81 | 7.84<br>110.89 | 7.79<br>110.75 | 7.80<br>110.77 |
| 8                                                                                      | 6.86<br>110.46     | 6.87<br>110.42 | 6.87<br>110.39 | 6.87<br>110.54 | 6.91<br>110.34 | 6.87<br>110.44 | 6.88<br>110.42 |
| 9                                                                                      | 7.91<br>111.64     | 7.94<br>112.07 | 7.91<br>111.60 |                | 7.93<br>111.62 | 7.79<br>110.75 | 7.92<br>111.60 |
| 10                                                                                     | 6.33<br>111.77     | 6.32<br>111.69 | 6.32<br>111.76 | 6.33<br>111.94 | 6.31<br>111.69 | 6.32<br>111.72 | 6.32<br>111.72 |
| 11                                                                                     | 8.79<br>112.89     | 8.80<br>112.87 | 8.80<br>112.89 | 8.78<br>112.87 | 8.79<br>112.89 | 8.85<br>113.21 | 8.80<br>112.89 |
| 12                                                                                     | 8.25<br>114.83     | 8.24<br>114.90 | 8.25<br>114.90 |                | 8.24<br>114.87 | 8.24<br>114.90 | 8.25<br>114.87 |
| 13                                                                                     | 8.09<br>114.65     | 8.09<br>114.65 | 8.10<br>114.66 | 8.01<br>114.58 | 8.08<br>114.68 | 8.09<br>114.71 | 8.11<br>114.65 |
| 14                                                                                     | 8.98<br>116.90     | 9.02<br>117.04 | 8.98<br>116.80 |                | 9.00<br>116.73 | 7.92<br>111.66 | 9.01<br>116.85 |
| 15                                                                                     | 8.48<br>116.71     | 8.48<br>116.75 | 8.48<br>116.73 | 8.49<br>116.78 | 8.48<br>116.77 | 8.49<br>116.77 | 8.48<br>116.78 |
| 16                                                                                     | 8.31<br>116.65     | 8.32<br>116.68 | 8.32<br>116.65 | 8.30<br>116.54 |                | 8.31<br>116.66 | 8.32<br>116.65 |
| 17                                                                                     | 8.89<br>117.81     | 8.89<br>117.81 | 8.89<br>117.81 |                | 8.94<br>117.69 | 9.00<br>116.88 | 8.89<br>117.84 |
| 18                                                                                     | 8.62<br>117.50     | 8.62<br>117.50 | 8.62<br>117.50 | 8.61<br>117.58 |                | 8.63<br>117.59 | 8.62<br>117.57 |
| 19                                                                                     | 9.81               | 9.81           | 9.82           |                | 9.80           | 9.78           | 9.82           |

<sup>1</sup> Chemical shifts for <sup>1</sup>H (top value in each entry) and <sup>15</sup>N (bottom value in each entry).

|    |        |        |        |        |        |        |        |
|----|--------|--------|--------|--------|--------|--------|--------|
|    | 118.05 | 118.03 | 118.06 |        | 118.10 | 118.06 | 118.06 |
| 20 | 8.81   | 8.81   | 8.82   | 8.83   | 8.77   | 8.82   | 8.82   |
|    | 118.94 | 118.92 | 118.92 | 119.00 | 119.16 | 118.95 | 118.95 |
| 21 | 8.78   | 8.75   | 8.80   | 8.77   | 8.78   | 8.78   | 8.79   |
|    | 121.50 | 121.41 | 121.67 | 121.90 | 121.53 | 121.47 | 121.48 |
| 22 | 8.78   | 8.79   | 8.79   | 8.78   | 8.78   | 8.79   | 8.80   |
|    | 122.90 | 122.88 | 122.90 | 123.02 | 122.99 | 122.94 | 122.92 |
| 23 | 8.53   | 8.53   | 8.53   |        | 8.51   | 8.54   | 8.54   |
|    | 126.70 | 126.70 | 126.76 |        | 126.90 | 126.83 | 126.78 |
| 24 | 7.08   | 7.07   | 7.12   | 7.15   | 7.08   | 7.10   | 7.09   |
|    | 118.85 | 118.85 | 118.73 | 118.51 | 118.88 | 118.83 | 118.85 |
| 25 | 6.95   | 6.96   | 6.94   | 6.94   | 6.96   | 6.95   | 6.96   |
|    | 120.17 | 120.23 | 120.20 | 120.04 | 120.22 | 120.18 | 120.22 |
| 26 | 7.30   | 7.30   | 7.30   | 7.30   | 7.30   | 7.30   | 7.30   |
|    | 121.35 | 121.40 | 121.33 | 121.05 | 121.40 | 121.41 | 121.40 |
| 27 | 6.69   | 6.70   | 6.70   | 6.70   |        | 6.69   | 6.71   |
|    | 122.30 | 122.32 | 122.29 | 122.37 |        | 122.37 | 122.34 |
| 28 | 7.02   | 7.03   | 7.00   | 7.01   | 7.10   | 7.01   | 7.02   |
|    | 124.70 | 124.68 | 124.66 | 124.82 | 123.82 | 124.66 | 124.66 |
| 29 | 6.79   | 6.80   | 6.80   | 6.78   | 6.83   | 6.77   | 6.80   |
|    | 126.71 | 126.70 | 126.71 | 126.72 | 127.02 | 126.44 | 126.68 |
| 30 | 9.45   | 9.46   | 9.46   | 9.44   | 9.52   | 9.47   | 9.48   |
|    | 130.83 | 130.83 | 130.85 | 130.85 | 130.90 | 130.85 | 130.87 |

**Table S2 (Related to Figures 1 and S4 to S6). Chemical Shifts of the Signals 1 to 30, which were used to Monitor the Protein Folds of A<sub>2A</sub>AR Variants.**

<sup>1</sup>H and <sup>15</sup>N chemical shifts are listed for A<sub>2A</sub>AR and the six variants thereof which were used for the assignment of the tryptophan indole <sup>15</sup>N-<sup>1</sup>H signals.

| <i>Data collection</i>                      |                       |
|---------------------------------------------|-----------------------|
| Number of crystals used for data processing | 18                    |
| Space group                                 | $C2\ 2\ 2_1$          |
| Cell dimensions                             |                       |
| <i>a</i> , <i>b</i> , <i>c</i> (Å)          | 39.84, 180.97, 140.57 |
| Number of reflections processed             | 60,178                |
| Number of unique reflections                | 16,063                |
| Resolution (Å)                              | 30.0 - 2.50           |
| $R_{sym}$                                   | 19.8 (64.8)           |
| Mean $I/\sigma(I)$                          | 6.3 (1.2)             |
| Completeness (%)                            | 90.1 (78.7)           |
| Redundancy                                  | 3.7 (2.3)             |
| $CC_{1/2}$ in highest shell                 | 0.581                 |
| <i>Refinement</i>                           |                       |
| Resolution (Å)                              | 30.0 - 2.50           |
| Number of reflections (test set)            | 797                   |
| $R_{work} / R_{free}$                       | 0.219/0.259           |
| Number of atoms                             |                       |
| Protein                                     | 2,956                 |
| Ligand                                      | 25                    |
| Lipids and waters                           | 279                   |
| Overall <i>B</i> values (Å <sup>2</sup> )   |                       |
| A2a                                         | 50.2                  |
| Bril                                        | 86.3                  |
| Ligand                                      | 40.3                  |
| Lipids and water                            | 73.1                  |
| RMSD                                        |                       |
| Bond lengths (Å)                            | 0.010                 |
| Bond angles (°)                             | 1.06                  |
| Ramachandran plot statistics (%)*           |                       |
| Favored regions                             | 98.7                  |
| Allowed regions                             | 1.3                   |
| Disallowed regions                          | 0.0                   |

**Table S3 (Related to Figure 1). X-ray Diffraction Data Collection and Refinement Statistics.**

Highest resolution shell is shown in parentheses. Ramachandran plot statistics were calculated with the program Molprobity (Chen et al., 2010).

| Construct                         | Primer Sequence                                      |
|-----------------------------------|------------------------------------------------------|
| A <sub>2A</sub> AR[W29Y] Forward  | ATCCTGGGCAATGTGCTGGTGTGCTACGCCGTGTGGCTCAACAGCAACCTG  |
| A <sub>2A</sub> AR[W29Y] Reverse  | CAGGTTGCTGTTGAGCCACACGGCGTAGCACACCAGCACATTGCCCAGGAT  |
| A <sub>2A</sub> AR[W32Y] Forward  | AATGTGCTGGTGTGCTGGGCCGTGTACCTCAACAGCAACCTGCAGAACGTC  |
| A <sub>2A</sub> AR[W32Y] Reverse  | GACGTTCTGCAGGTTGCTGTTGAGGTACACGGCCCAGCACACCAGCACATT  |
| A <sub>2A</sub> AR[W129Y] Forward | GCTAAGGGCATCATTGCCATCTGCTACGTGCTGTCGTTTGCCATCGGCCTG  |
| A <sub>2A</sub> AR[W129Y] Reverse | CAGGCCGATGGCAAACGACAGCACGTAGCAGATGGCAATGATGCCCTTAGC  |
| A <sub>2A</sub> AR[W143Y] Forward | ATCGGCCTGACTCCCATGCTAGGTTACAACAACCTGCGGTGAGCCAAAGGAG |
| A <sub>2A</sub> AR[W143Y] Reverse | CTCCTTTGGCTGACCGCAGTTGTTGTAACCTAGCATGGGAGTCAGGCCGAT  |
| A <sub>2A</sub> AR[W246F] Forward | ATTGTGGGGCTCTTTGCCCTCTGCTTCCTGCCCTACACATCACTCAACTGC  |
| A <sub>2A</sub> AR[W246F] Reverse | GCAGTTGATGATGTGTAGGGGCAGGAAGCAGAGGGCAAAGAGCCCCACAAT  |
| A <sub>2A</sub> AR[W268Y] Forward | CCCGACTGCAGCCACGCCCTCTCTACCTCATGTACCTGGCCATCGTCCTC   |
| A <sub>2A</sub> AR[W268Y] Reverse | GAGGACGATGGCCAGGTACATGAGGTAGAGAGGGGCGTGGCTGCAGTCGGG  |
| A <sub>2A</sub> AR[D52N] Forward  | TTTGTGGTGTCACTGGCGGCGGCCAACATCGCAGTGGGTGTGCTCGCCATC  |
| A <sub>2A</sub> AR[D52N] Reverse  | GATGGCGAGCACACCCACTGCGATGTTGGCCGCCAGTGACACCACAAA     |
| A <sub>2A</sub> AR[G5A] Forward   | GATGACGATAAGATGCCCATCATGGCTTCCTCGGTGTACATCACGGTGGAG  |
| A <sub>2A</sub> AR[G5A] Reverse   | CTCCACCGTGATGTACACCGAGGAAGCCATGATGGGCATCTTATCGTCATC  |
| A <sub>2A</sub> AR[G69A] Forward  | CCCTTTGCCATCACCATCAGCACCGCTTTCTGCGCTGCCTGCCACGGCTGC  |
| A <sub>2A</sub> AR[G69A] Reverse  | GCAGCCGTGGCAGGCAGCGCAGAAAGCGGTGCTGATGGTGTATGGCAAAGGG |
| A <sub>2A</sub> AR[G114A] Forward | ATCCGCATCCCGCTCCGGTACAATGCTTTGGTGACCGGCACGAGGGCTAAG  |
| A <sub>2A</sub> AR[G114A] Reverse | CTTAGCCCTCGTGCCGGTACCAAAGCATTGTACCGGAGCGGGATGCGGAT   |
| A <sub>2A</sub> AR[G118A] Forward | CTCCGGTACAATGGCTTGGTGACCGCTACGAGGGCTAAGGGCATCATTGCC  |
| A <sub>2A</sub> AR[G118A] Reverse | GGCAATGATGCCCTTAGCCCTCGTAGCGGTACCAAGCCATTGTACCGGAG   |
| A <sub>2A</sub> AR[G158A] Forward | AAGGAGGGCAAGCAACACTCCAGGCTTGCGGGGAGGGCCAAGTGGCCTGT   |
| A <sub>2A</sub> AR[G158A] Reverse | ACAGGCCACTTGCCCTCCCGCAAGCCTGGGAGTGTTGCTTGCCCTCCTT    |
| A <sub>2A</sub> AR[G160A] Forward | GGCAAGCAACACTCCAGGGCTGCGCTGAGGGCCAAGTGGCCTGTCTCTTT   |
| A <sub>2A</sub> AR[G160A] Reverse | AAAGAGACAGGCCACTTGCCCTCAGCGCAGCCCTGGGAGTGTTGCTTGCC   |
| A <sub>2A</sub> AR[G218A] Forward | CAGATGGAGAGCCAGCCTTGCCGGCTGAGCGGGCACGGTCCACACTGCAG   |
| A <sub>2A</sub> AR[G218A] Reverse | CTGCAGTGTGGACCGTGCCCGCTCAGCCGGCAGAGGCTGGCTCTCCATCTG  |

**Table S4 (Related to STAR Methods section). Primers used in this study.**

|                                                                |
|----------------------------------------------------------------|
| Plasmid: human A <sub>2A</sub> AR in pPIC9K vector             |
| Plasmid: human A <sub>2A</sub> AR[W29Y]                        |
| Plasmid: human A <sub>2A</sub> AR[W32Y]                        |
| Plasmid: human A <sub>2A</sub> AR[W129F]                       |
| Plasmid: human A <sub>2A</sub> AR[W143Y]                       |
| Plasmid: human A <sub>2A</sub> AR[W246F]                       |
| Plasmid: human A <sub>2A</sub> AR[W268Y]                       |
| Plasmid: human A <sub>2A</sub> AR[G5A]                         |
| Plasmid: human A <sub>2A</sub> AR[G69A]                        |
| Plasmid: human A <sub>2A</sub> AR[G114A]                       |
| Plasmid: human A <sub>2A</sub> AR[G118A]                       |
| Plasmid: human A <sub>2A</sub> AR[G158A]                       |
| Plasmid: human A <sub>2A</sub> AR[G160A]                       |
| Plasmid: human A <sub>2A</sub> AR[G218A]                       |
| Plasmid: human A <sub>2A</sub> AR[D52N]                        |
| Plasmid: human A <sub>2A</sub> AR[D52N, W246F]                 |
| Plasmid: human A <sub>2A</sub> AR with BRIL inserted into ICL3 |

**Table S5 (Related to STAR Methods section). Plasmids used in this study.**
