# Supplementary material
Source: PubMed Central journal article supplement (PMC5766378)

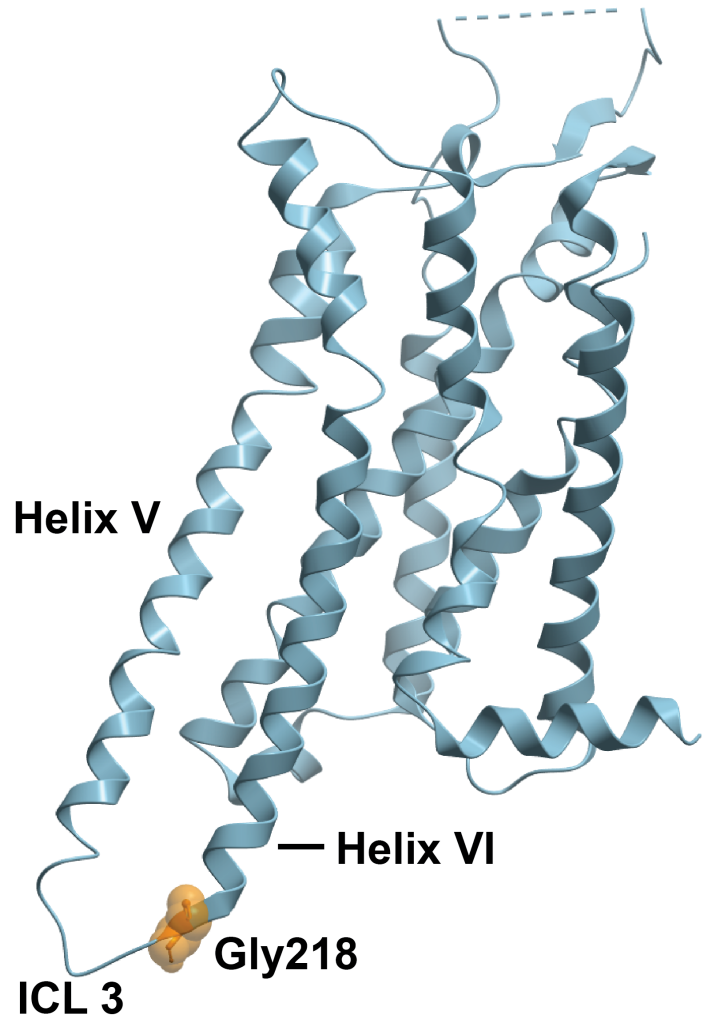

Supplement: NIHMS930888-supplement-1.pdf [file NIHMS930888-supplement-1.pdf]

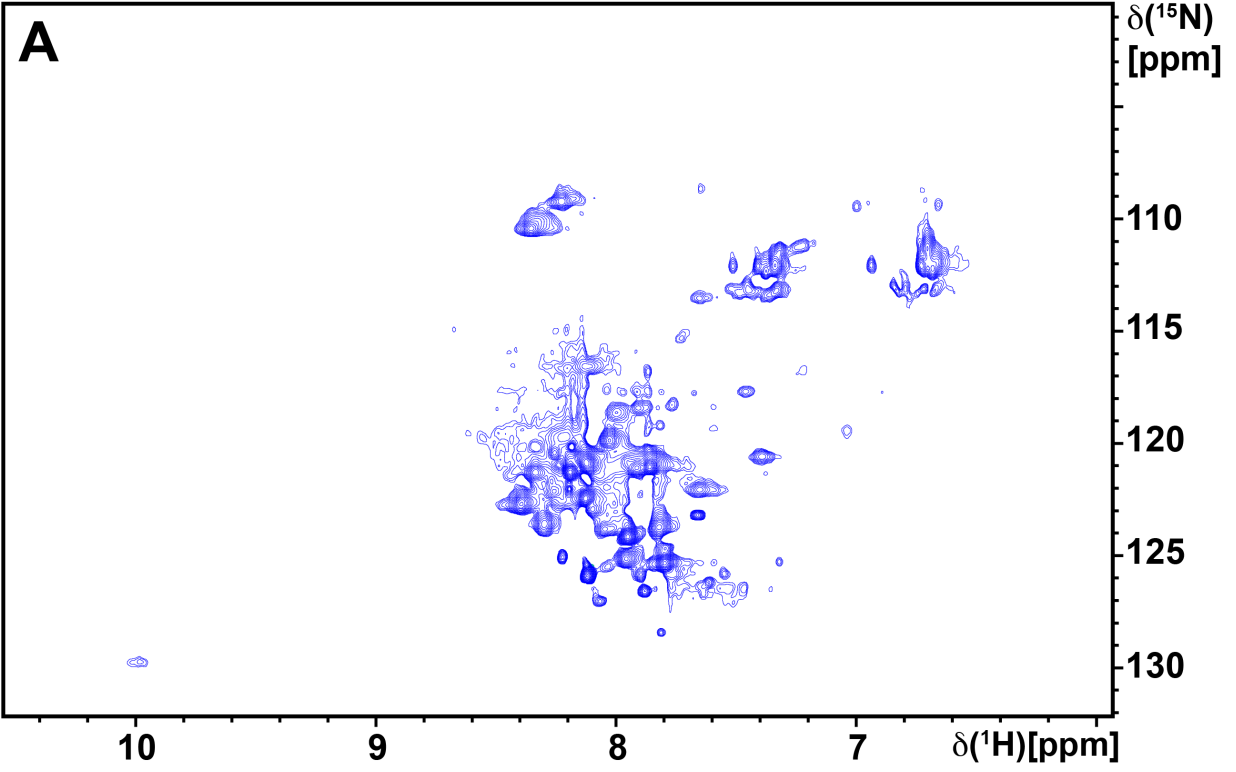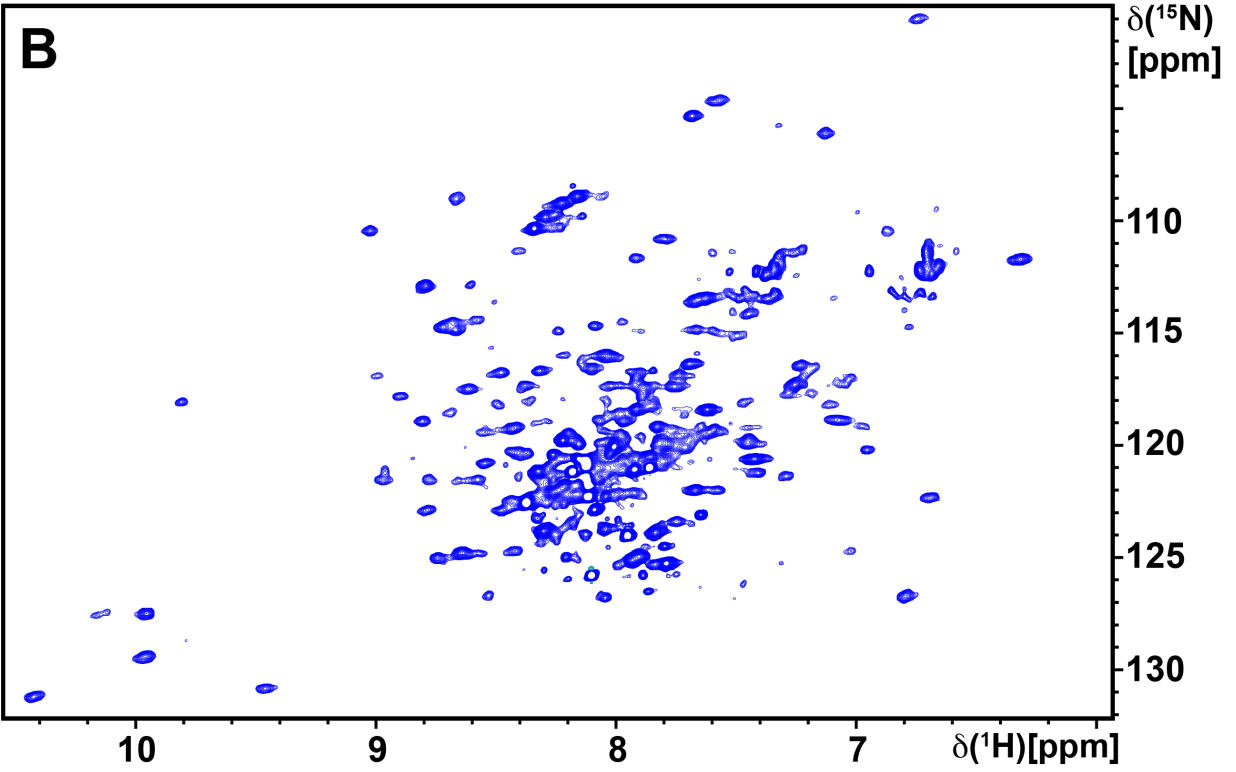

Supplement: NIHMS930888-supplement-2.pdf [file NIHMS930888-supplement-2.pdf]

**A<sub>2A</sub>AR[W29Y]**

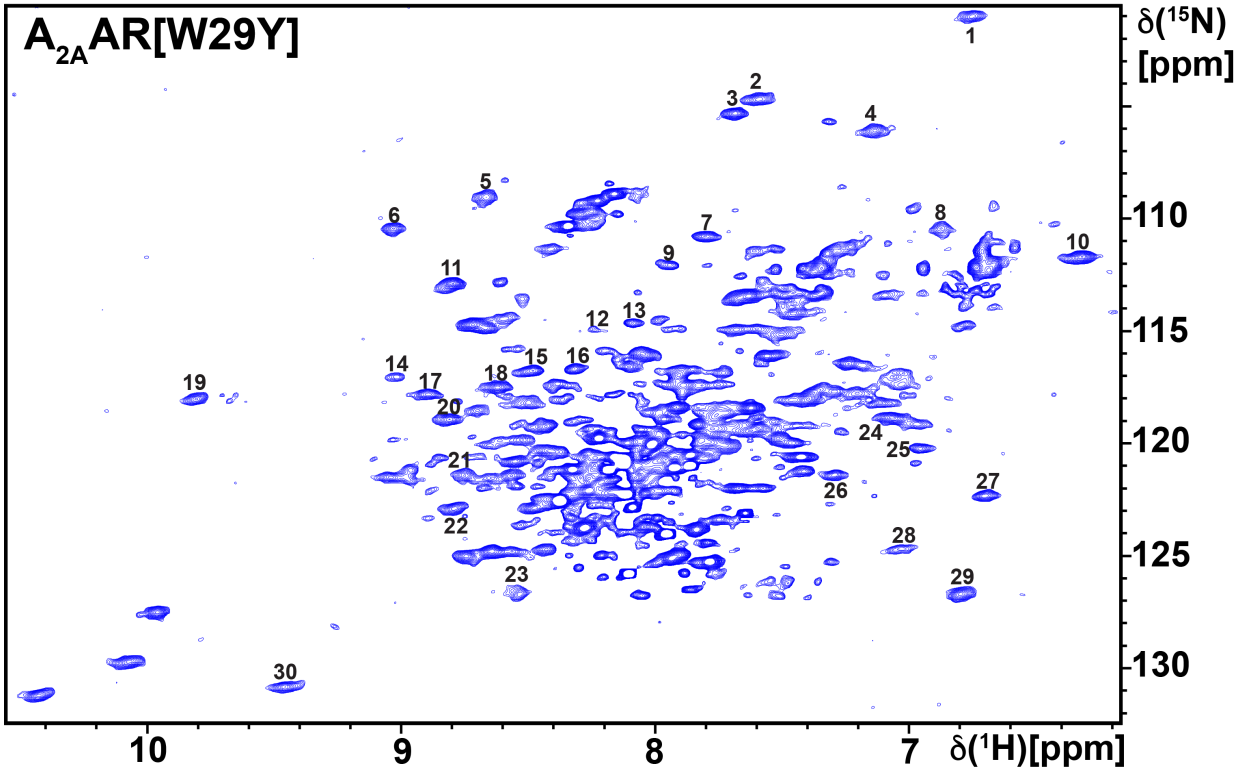

**A<sub>2A</sub>AR[W32Y]**

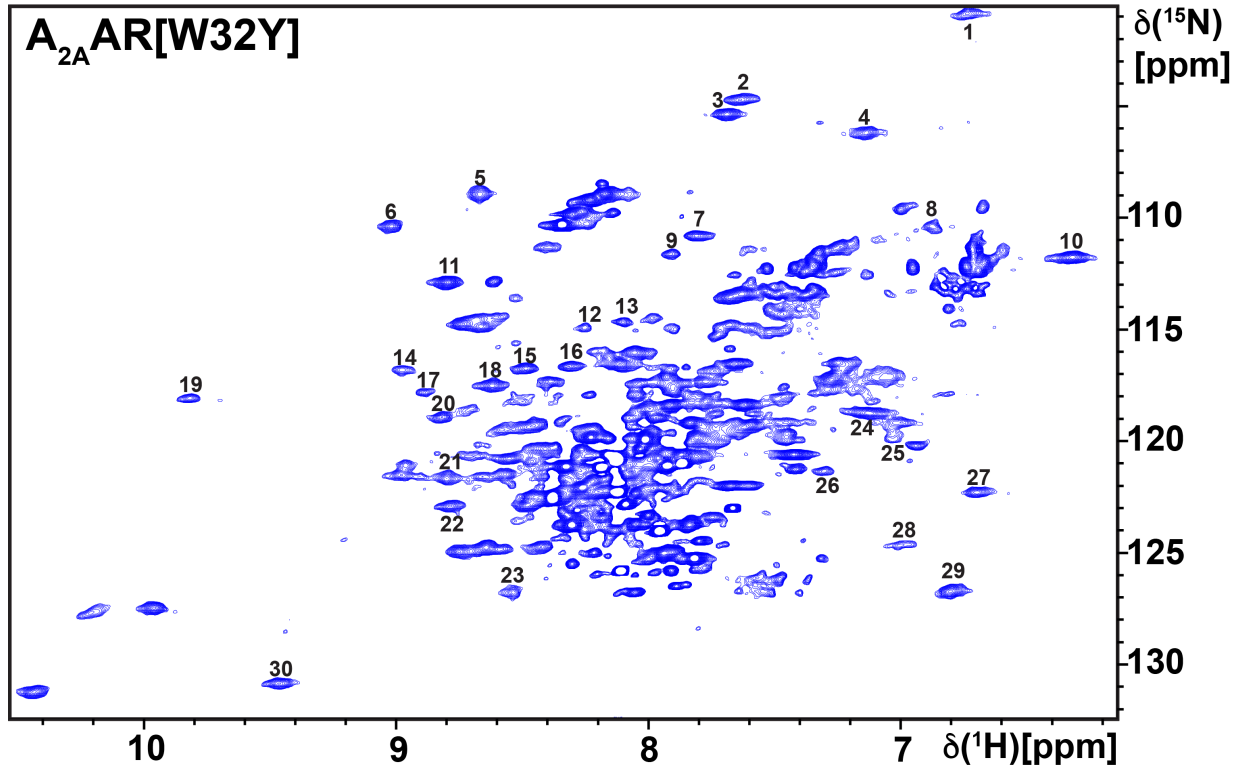

Supplement: NIHMS930888-supplement-4.pdf [file NIHMS930888-supplement-4.pdf]

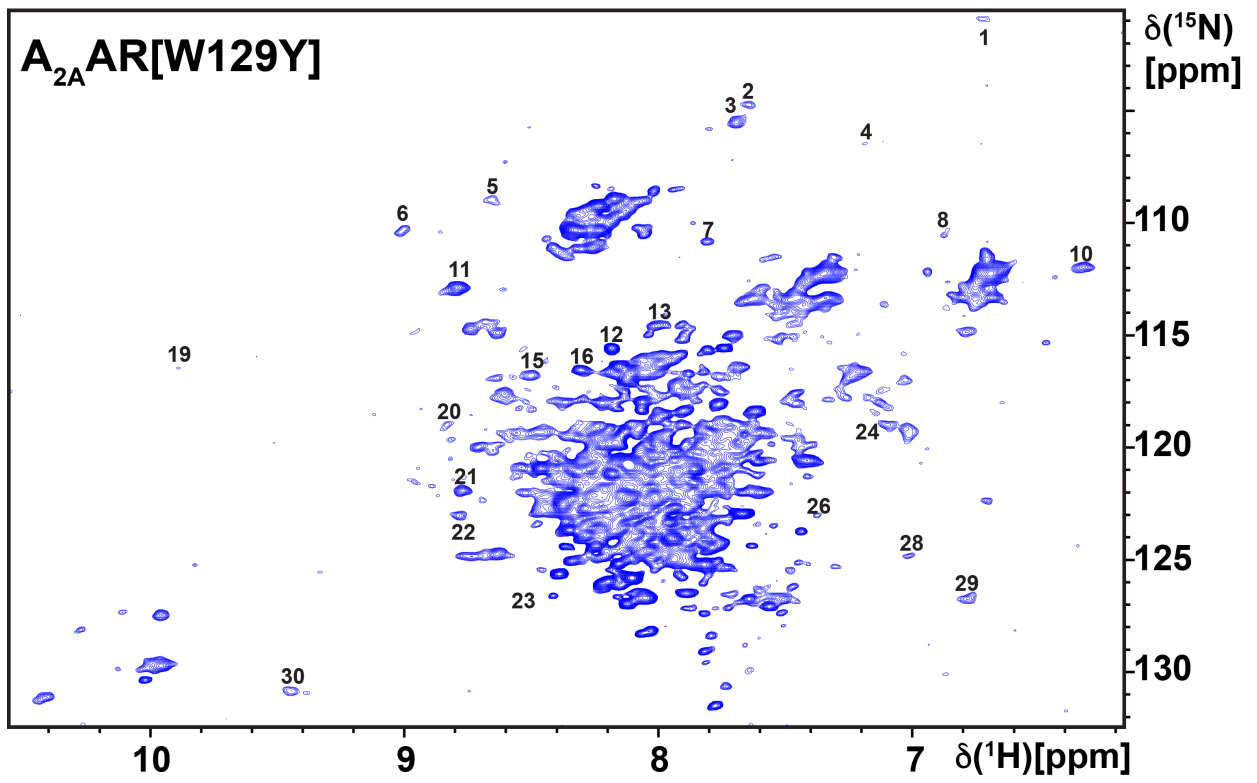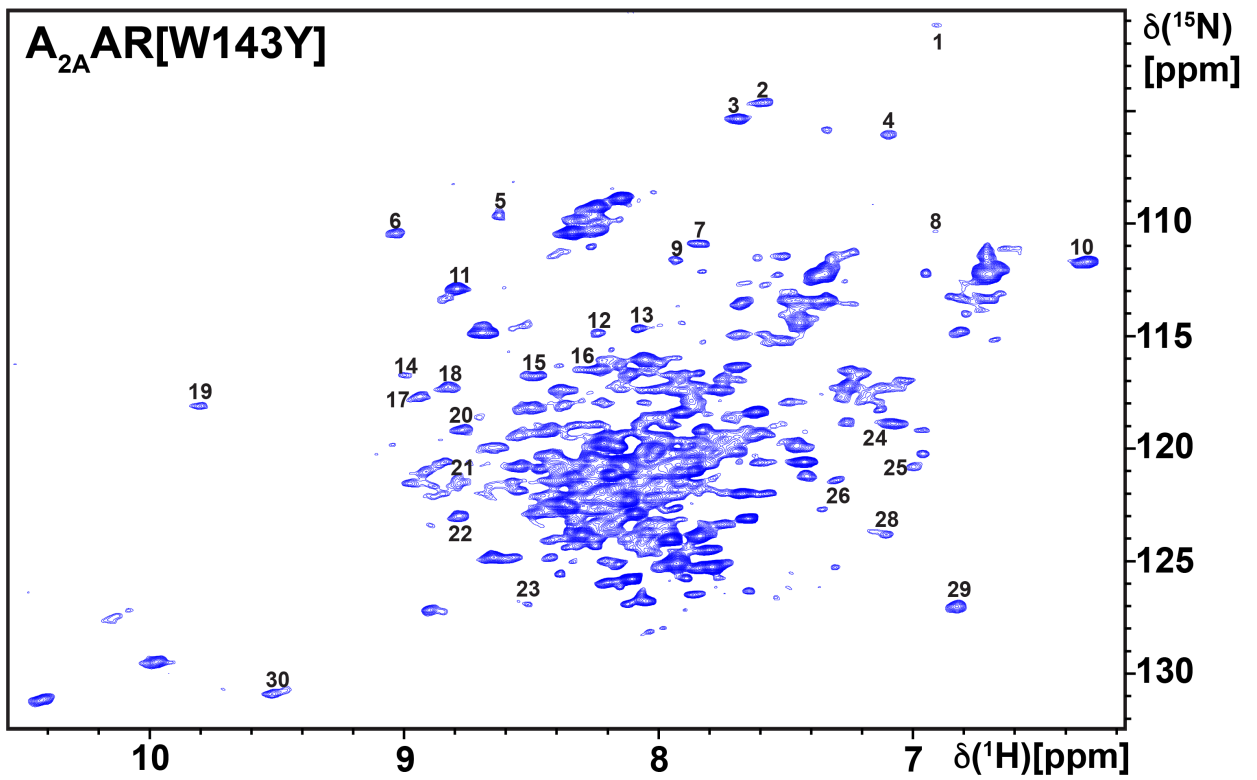

Supplement: NIHMS930888-supplement-5.pdf [file NIHMS930888-supplement-5.pdf]

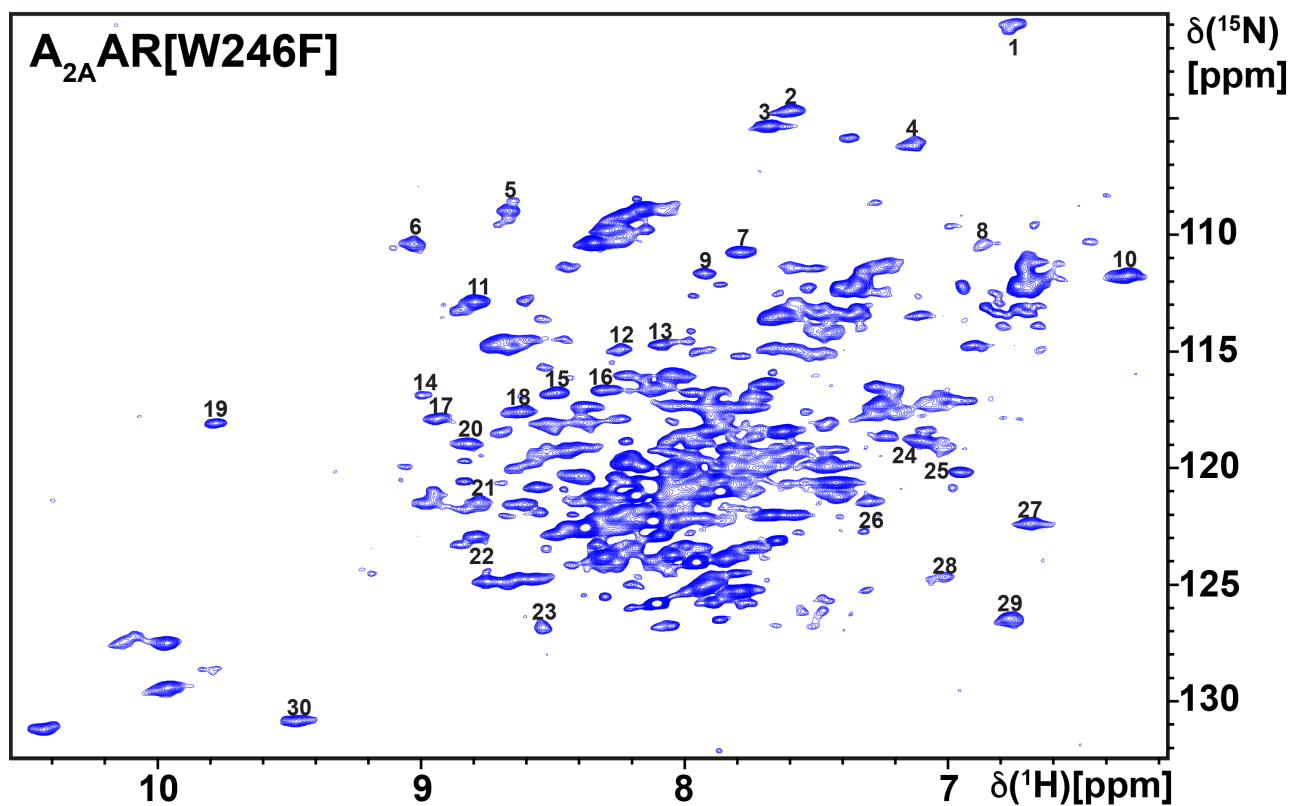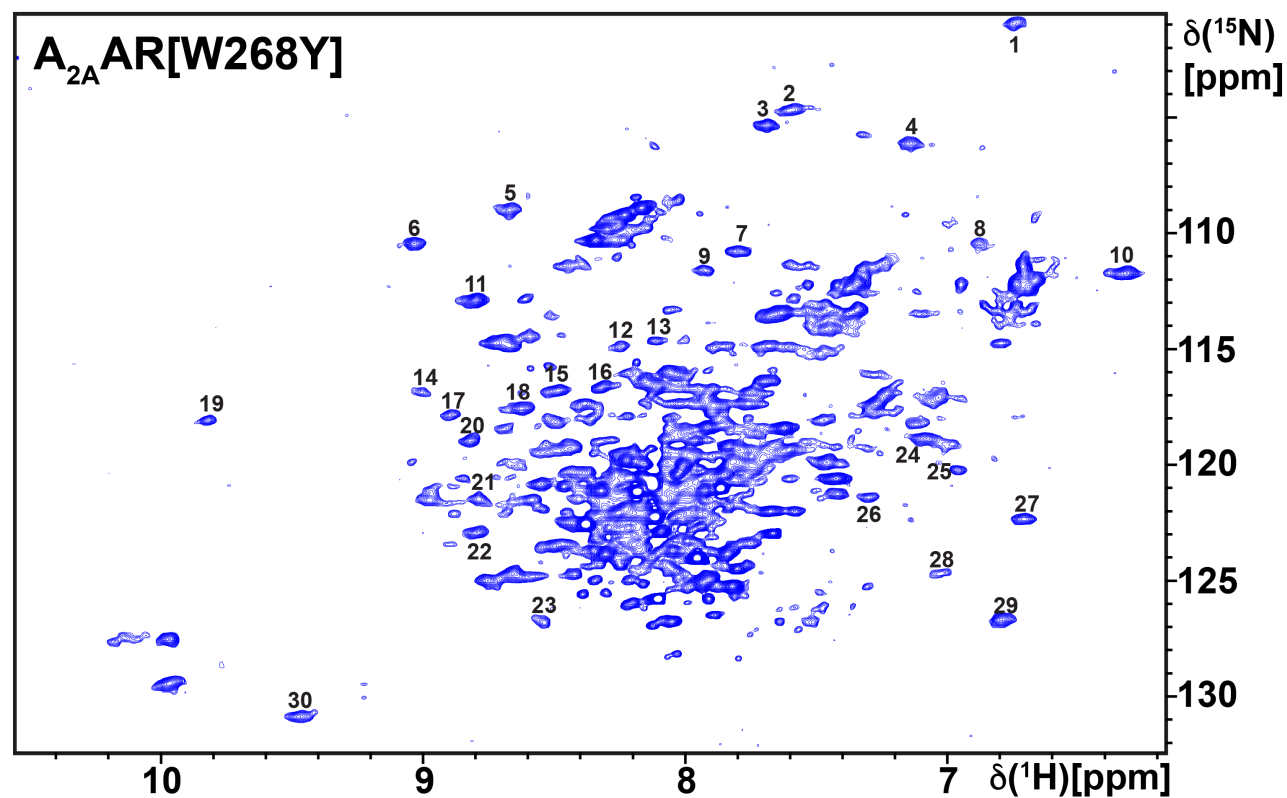

Supplement: NIHMS930888-supplement-6.pdf [file NIHMS930888-supplement-6.pdf]

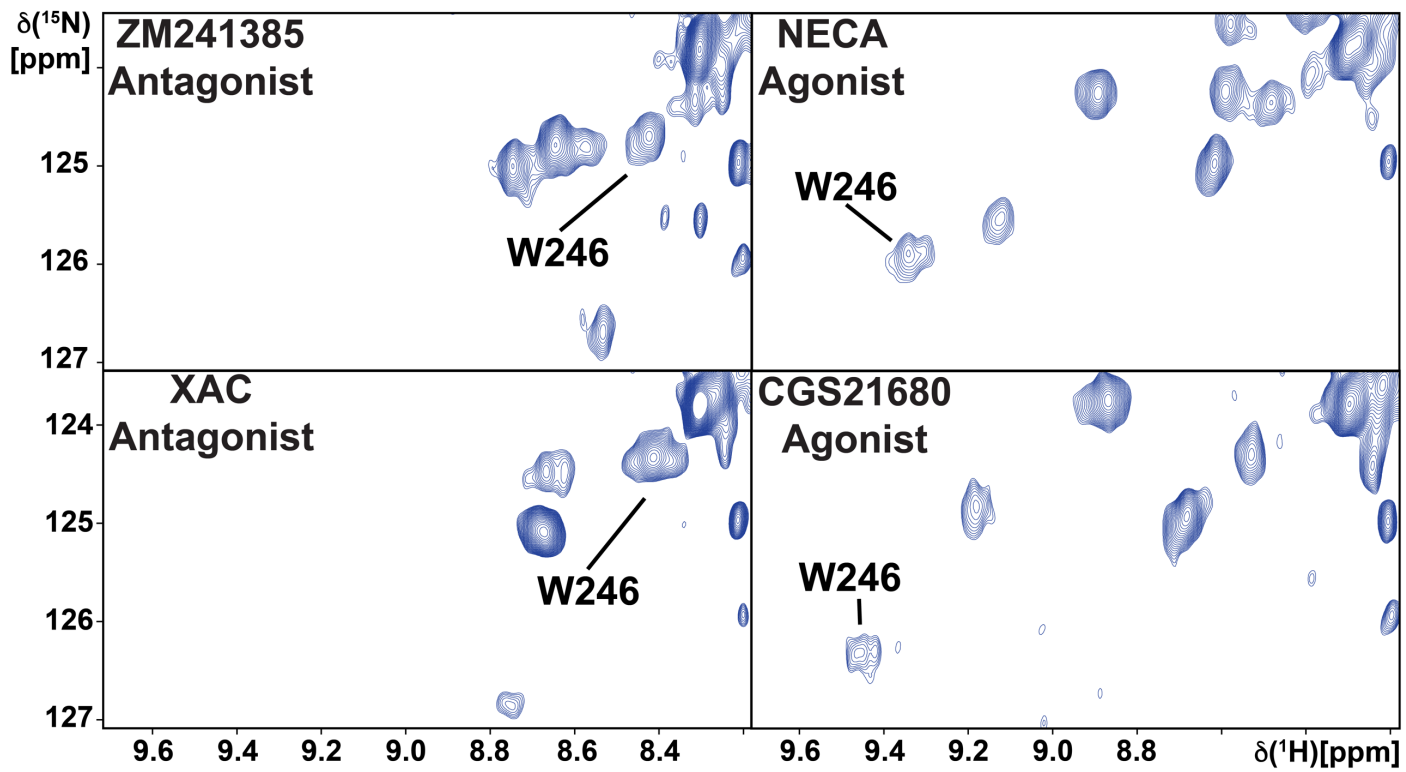

Supplement: NIHMS930888-supplement-7.pdf [file NIHMS930888-supplement-7.pdf]
